1 Title

2 **Post-saccadic face processing is modulated by pre-saccadic preview:**  
3 **Evidence from fixation-related potentials**

4

5 Abbreviated title

6 Post-saccadic preview benefits

7 Authors

8

9 Antimo Buonocore<sup>1,2\*</sup>, Olaf Dimingen<sup>3\*</sup>, David Melcher<sup>4</sup>

10

11 1. Werner Reichardt Centre for Integrative Neuroscience, University of Tuebingen,  
12 Tuebingen, Germany.

13 2. Hertie Institute for Clinical Brain Research, Tuebingen University, Tuebingen, Germany,  
14 72076

15 3. Department of Psychology, Humboldt-Universitaet zu Berlin, Berlin, Germany

16 4. Center for Mind/Brain Sciences, University of Trento, Rovereto, Italy

17 \* Equal contribution

18

19

20 Corresponding author:

21 Antimo Buonocore

22 Werner Reichardt Centre for Integrative Neuroscience

23 Otfried-Müller Str. 25

24 Tübingen, 72076, Germany

25 Tel: +49 7071 29 88821

26 [antimo.buonocore@cin.uni-tuebingen.de](mailto:antimo.buonocore@cin.uni-tuebingen.de)

## 27 **Abstract**

28 Humans actively sample their environment with saccadic eye movements to bring relevant  
29 information into high-acuity foveal vision. Despite being lower in resolution, peripheral  
30 information is also available prior to each saccade. How pre-saccadic extrafoveal preview  
31 of a visual object influences its post-saccadic processing is still an unanswered question.  
32 Here, we investigated this question by simultaneously recording behavior and fixation-  
33 related brain potentials while human subjects made saccades to face stimuli. We  
34 manipulated the relationship between pre-saccadic “previews” and post-saccadic images  
35 to explicitly isolate the influences of the former. Subjects performed a gender  
36 discrimination task on a newly foveated face under three preview conditions: phase-  
37 scrambled face, incongruent face (different identity from the foveated face), and congruent  
38 face (same identity). As expected, reaction times were faster after a congruent-face  
39 preview compared to the phase-scrambled and incongruent conditions. Importantly, a face  
40 preview (either incongruent or congruent) resulted in a dramatic reduction of post-saccadic  
41 neural responses. Specifically, we analyzed the classic face-selective N170 component at  
42 occipito-temporal EEG electrodes, which was still present in our experiments with active  
43 looking. We found that this component was strongly attenuated for face preview conditions  
44 compared to scrambled conditions. This large and long-lasting decrease in evoked activity  
45 is consistent with an active prediction mechanism influencing category-specific neural  
46 processing at the start of a new fixation. These findings constrain theories of visual stability  
47 and show that the extrafoveal preview methodology can be a useful tool to investigate its  
48 underlying mechanisms.

49

## 50 **Significance Statement**

51 Neural correlates of object recognition have traditionally been studied by flashing stimuli to  
52 the central visual field. This procedure differs in fundamental ways from natural vision,  
53 where viewers actively sample the environment with eye movements and also obtain a  
54 low-resolution preview of soon-to-be-fixated objects. Here we show that the N170, a  
55 classic electrophysiological marker of the structural processing of faces, also occurs during  
56 a more natural viewing condition but is massively reduced due to extrafoveal  
57 preprocessing (preview benefit). Our results therefore highlight the importance of  
58 peripheral vision during trans-saccadic processing in building a coherent and stable  
59 representation of the world around us.

## 60 **Introduction**

61 In natural viewing, visual processing takes place primarily during periods of fixation, which  
62 are separated by fast and ballistic eye movements known as saccades. Unlike laboratory  
63 experiments, in which stimuli appear suddenly, the image that presents itself in the fovea  
64 at the beginning of each fixation is usually the result of a choice to fixate that item, typically  
65 based on a low-resolution peripheral preview of that object. Whether such a peripheral  
66 preview influences visual processing at the beginning of a new fixation, and how this might  
67 fit into different competing theories regarding why visual perception seems stable and  
68 continuous across saccades, remains an important question.

69 One view posits that the integration of pre- and post-saccadic information, at the  
70 level of neural mechanisms, involves a form of active prediction (Srinivasan et al., 1982;  
71 Rao and Ballard, 1999; Clark, 2013). The peripheral preview and the oculomotor plan for  
72 the next saccade might be combined to predict where the eye will land and what visual  
73 features will be present (for review, Melcher and Colby, 2008; Melcher, 2011). In the case  
74 of reading, a classic finding is the preview benefit effect in behavior (Rayner, 1975): when  
75 a word is visible in the periphery prior to the saccade, the subsequent fixation on the word  
76 is shorter compared to an invalid preview (Dimigen et al., 2012). When looking at fixation-  
77 related brain potentials (fERPs), Dimigen and colleagues have shown that such behavioral  
78 benefits are also associated with a reduction of the word-specific neural response, an  
79 effect termed the “preview positivity” (Dimigen et al., 2012; Kornrumpf et al., 2016).

80 Along these lines, several recent studies using fMRI have demonstrated a reduction  
81 in BOLD responses when a stimulus is consistent across the saccade (Dunkley et al.,  
82 2016; Zimmermann et al., 2016; Fairhall et al., 2017). For more complex images such as  
83 faces, there is behavioral evidence for an interaction across the saccade that can  
84 influence post-saccadic percepts (Melcher, 2005; Wolfe and Whitney, 2014). Recently,  
85 Edwards and colleagues (2017) showed that the decoding of post-saccadic EEG

86 responses to faces was possible earlier when the preview of the target did not change  
87 during the execution of the saccade, suggesting the use of peripheral information.

88         An alternative view on active prediction focusses instead on the spatial shift of  
89 attention towards the peripheral stimulus. Prior to saccade execution, attention is directed  
90 towards the saccade target (Hoffman and Subramaniam, 1995; Deubel and Schneider,  
91 1996; Zhao et al., 2012; Buonocore et al., 2017) and this attentional shift has been  
92 implicated in many theories of stable perception (Mathôt and Theeuwes, 2011; Melcher,  
93 2011). A key idea here is that selective attention is immediately present at the beginning of  
94 the new fixation, leading to attentional facilitation of post-saccadic processing (for review,  
95 see Mathôt and Theeuwes, 2011). In contrast to active prediction, which typically results in  
96 a reduction in evoked responses, selective attention tends to amplify neural responses (for  
97 review, Thiele and Bellgrove, 2018). In the case of face stimuli, for example, selective  
98 attention enhances the evoked response to the stimulus (Mohamed et al., 2009;  
99 Sreenivasan et al., 2009; Churches et al., 2010). If overt attention shifts are similar to  
100 covert ones, then the post-saccadic fixation-related ERPs would be expected to be larger  
101 in amplitude when a preview is available, due to the target receiving attentional  
102 enhancement. Testing whether there is an increase in neural activity (due to attention)  
103 versus a reduction (due to prediction) has therefore been suggested to be a marker to  
104 differentiate between these two mechanisms (Kok et al., 2012; Spaak et al., 2016; de  
105 Lange et al., 2018).

106         The aim of the current study was to investigate whether a peripheral preview of a  
107 face image would influence the post-saccadic processing of that face and, if so, whether it  
108 would lead to an increase (attention) or reduction (prediction) in the neural response. We  
109 tested this hypothesis by measuring the effect of the pre-saccadic preview stimulus (either  
110 an intact or phase-scrambled face) on post-saccadic evoked response.

111

## 112 **Materials and Methods**

### 113 *Participants*

114 Seventeen volunteers (12 females) between 18 and 30 years of age ( $M = 23.6$ )  
115 participated in the study. All were free from neurological and visual impairments. The  
116 experiment was conducted in accordance with the Declaration of Helsinki (2008) and  
117 approved by the University of Trento Research Ethics Committee. All participants provided  
118 informed written consent and received a compensation of €10 per hour.

119

### 120 *Apparatus*

121 Stimuli were presented on a 24-inch LED monitor (resolution: 1920×1080 pixels,  
122 subtending 39° × 24.7°) at a vertical refresh of 120 Hz. To reduce head movements,  
123 participants were seated with their head stabilized by a chin and forehead rest. The eyes  
124 were horizontally and vertically aligned with the center of the screen at a viewing distance  
125 of 63 cm. Eye movements were recorded with a video-based eye tracker (EyeLink 1000  
126 with desktop mount; SR Research, Ontario, Canada) at a sampling rate of 1000 Hz  
127 (detection algorithm: pupil and corneal reflex; thresholds for saccade detection: 30 deg/s  
128 velocity and 9500 deg/s<sup>2</sup> acceleration). A five point-calibration and validation of the eye  
129 tracker on a standard rectangular grid was run at the beginning of the experiment and  
130 whenever necessary during the experiment. Programs for stimulus presentation and data  
131 collection were written in MATLAB (MathWorks) using the Psychophysics Toolbox Version  
132 3 (Brainard, 1997; Pelli, 1997) and Eyelink Toolbox extensions (Cornelissen et al., 2002).  
133 Participants' manual responses were recorded on a standard keyboard.

134 The electroencephalogram (EEG) was recorded from 64 Ag/AgCl electrodes (Brain  
135 Products GmbH, Munich, Germany) placed at standard locations of the International 10-10  
136 system. Signals were recorded with a time constant of 10 s and a high cutoff of 250 Hz,  
137 referenced online against the left mastoid, and digitized at a rate of 1000 Hz. The system

138 was set up with a parallel port splitter so that trigger pulses were sent simultaneously to  
139 the EyeLink and EEG acquisition computers.

140

#### 141 *Procedure*

142 Participants were seated in a dimly lit room and then briefly familiarized with the task by  
143 the experimenter. Figure 1 illustrates the trial scheme. Participants started each trial by  
144 pressing the space bar while maintaining their gaze at a central fixation cross (0.5° wide,  
145 shown in white on a black background). One second after this button press, two circular  
146 placeholders (white rings, diameter 4°, line width 1 pixel) appeared to the left and right of  
147 the central fixation cross. Placeholders were centered at eccentricities of  $\pm 8^\circ$  and indicated  
148 the positions of the upcoming preview stimuli. Once the eye tracker detected a stable  
149 fixation for 1000 ms within an area of 2° around the central fixation cross, the preview  
150 display was triggered. Depending on the condition, the preview display consisted either of  
151 two different scrambled faces (*scrambled-face preview* condition) or two different intact  
152 faces (*intact-face preview* condition) that appeared at the previous positions of the  
153 placeholders (see Fig. 1, panel “Preview”). After 500 ms of preview, the fixation cross  
154 changed its color and turned either green or red, thereby cueing the participant to execute  
155 a saccade towards the left or right stimulus, respectively (Fig. 1, panel “Saccade cue”).  
156 Participants were instructed to respond as quickly and accurately as possible to the cue  
157 with a single saccade.

158 During the saccade, once gaze position crossed an invisible vertical boundary  
159 placed a distance of 1° from the fixation cross, a scrambled version of the preview face  
160 (that was always different from those shown as previews in the scrambled-face preview  
161 condition) was transiently presented for just a single display cycle (8.3 ms; see Fig. 1,  
162 panel “Transient”). The purpose of this gaze-contingent display change was to introduce  
163 an intra-saccadic visual transient in all experimental conditions, that is, also in the

164 *congruent-face preview* condition in which the same face was presented before and after  
165 the saccade. After the transient was displayed, and still during the saccade, the preview  
166 stimulus always changed into an intact face (Fig. 1, panel “Target”). Participants then  
167 responded with a button press whether the face that they had landed on with their eyes  
168 was male or female. Responses were given with the index fingers of the left and right hand  
169 using two keyboard buttons.

170 The experimental design comprised three main conditions: *scrambled-face preview*,  
171 *incongruent-face preview*, and *congruent-face preview* (Fig. 1, panel “Preview”). Each  
172 condition comprised 160 trials, leading to a total of 480 trials. Conditions differed in terms  
173 of the stimulus shown before the saccade (preview stimulus). In the *scrambled-face*  
174 *preview* condition, the stimuli presented during the preview interval were scrambled faces.  
175 In contrast, in both the *incongruent- and congruent-face preview* conditions, the stimuli  
176 shown as previews were intact faces. After the saccade, participants always looked at a  
177 face as the target stimulus. This means that in the *scrambled-face preview* condition, the  
178 scrambled face shown as a preview changed into a face. In the *incongruent-face preview*  
179 condition, the target face shown after the saccade was different from the preview face  
180 seen before the saccade (in this condition, the face shown at the irrelevant screen location  
181 opposite the cued saccade direction remained the same). Finally, in the *congruent-face*  
182 *preview* condition, the target stimulus was identical to the face presented at this position  
183 before the saccade. The face seen after the saccade was equiprobably male and female  
184 and the gender of the target face was counterbalanced with the preview condition.

185

## 186 *Stimuli*

187 Forty-two grayscale images were selected from the Nottingham face database  
188 (<http://pics.stir.ac.uk/zips/nottingham.zip>), each showing a frontal view of a face (21  
189 female, 21 male) with a neutral facial expression. To standardize the images and to reduce



190 differences between the genders, a black mask with a circular aperture was applied to  
191 each face to cover the external facial features (e.g. hair, see Fig. 1). The aperture was  
192 centered on the nose, spanned from the forehead to the chin, and subtended a diameter  
193 of 4° of visual angle at the viewing distance of 63 cm.

194 For each original face stimulus, we also generated a scrambled counterpart that  
195 was used as the pre-saccadic preview stimulus in the scrambled-face preview condition  
196 (see *Procedure*). For this purpose, we calculated the 2D Fourier transform of each face  
197 image and then added a matrix of random phase angles to the existing phase information  
198 of the image. We then performed an inverse Fourier transform, thereby preserving the  
199 original power spectrum of the image. The same circular aperture as for the intact faces  
200 was also applied to the scrambled images.

201 Finally, for each face image, we selected a second face stimulus that served as the  
202 saccade target in the condition with an incongruent preview as well as a third scrambled-  
203 face stimulus which was used as a transient during the saccade. Specifically, to control for  
204 low-level differences between the face stimuli shown before and after the saccade, we  
205 randomly selected for each image another face stimulus from the pool of 42 face images,  
206 such that their difference in average image luminance (estimated via their RGB grey  
207 values) was less than 4% (i.e. difference < 11 in 8-bit grey values) and not statistically  
208 significant (as confirmed by a one-way ANOVA). In addition, possible differences in image  
209 luminance between the stimulus shown before and after the saccade (see below) were  
210 also controlled by adding luminance as a predictor in the statistical analysis of the EEG  
211 (see section *Single-subject GLM*).

212

### 213 *Behavioral screening & analysis*

214 In an initial analysis step, trials were screened for incorrect oculomotor behavior.

215 Specifically, we removed all trials in which no saccade was executed towards either

216 stimulus (0.1% of trials) or an eye blink occurred around the time of saccade execution (-  
217 200 to 600 ms around saccade onset; 1.1%). Furthermore, we removed trials in which the  
218 eyes deviated from the central fixation cross by  $> 2^\circ$  during the preview interval (1.9%), the  
219 saccadic reaction time (SRT) was extremely short ( $< 100$  ms; 0.8%) or long ( $> 700$  ms,  
220 7.2%), saccade amplitude was extremely small ( $< 3^\circ$ ; 2.1%) or large ( $> 10^\circ$ ; 2.9%), or in  
221 which the saccade went in the wrong direction (6.0%). Finally, we excluded trials in which  
222 the saccade-contingent display change was triggered prematurely by drift movements or  
223 microsaccades during the preview interval (11.5%) or in which the main saccade to the  
224 target was followed by a secondary saccade larger than  $3^\circ$  within 150 ms or less (0.2%).  
225 After applying these behavioral criteria, two participants had to be excluded from the  
226 sample due to excessive trials loss ( $>60\%$ ), reducing the final sample to 15 participants.

227 Manual RTs and response accuracy in the gender discrimination task were then  
228 submitted to repeated-measures ANOVAs on the three-level factor *Preview*. For the  
229 analysis of the button presses, trials with an extreme manual RT ( $< 200$  or  $> 1000$  ms)  
230 were ignored as outliers. Furthermore, one participant was dropped from the manual RT  
231 analysis due to very slow manual RTs and therefore too few remaining trials.

232

### 233 *Electrophysiological data analysis*

234 For the electrophysiological analysis, the EEG was first synchronized with the eye-tracking  
235 channels based on the shared trigger pulses using the EYE-EEG toolbox (Dimigen et al.,  
236 2011). The synchronized EEG was then downsampled to 500 Hz, bandpass-filtered from  
237 0.1 to 40 Hz using EEGLAB's (Delorme and Makeig, 2004) finite response filter  
238 (*pop\_eegfiltnew.m*) with default settings, and digitally re-referenced to an average  
239 reference. In the next step, ocular EEG artifacts were removed using an optimized eye-  
240 tracker-guided variant of Infomax ICA in EEGLAB. To optimize the ICA decomposition and  
241 the suppression of the myogenic spike potential peaking at saccade onset (Keren et al.,

242 2011), the ICA was trained on a copy of the data high pass-filtered at 2 Hz (Winkler et al.,  
243 2015) in which EEG sampling points occurring around saccade onsets (-20 to +10 ms)  
244 were overweighted (see Dimigen, 2018). The resulting unmixing weights computed on this  
245 high-pass filtered and optimized training data were then applied to the original unfiltered  
246 recording, and ocular components were automatically flagged using the eye tracker-  
247 guided procedure by Plöchl et al. (2012) with the saccade/fixation variance ratio threshold  
248 set to 1.1 (Plöchl et al., 2012; Dimigen, 2018).

249         Based on the trials with a correct oculomotor behavior, we then extracted two sets  
250 of 1000 ms long epochs (-300 to 700 ms) from the artifact-corrected EEG. The first set  
251 was cut around the onset of the preview stimuli on the screen (traditional ERP average).  
252 The second set was cut around the onset of the first fixation on the target face following  
253 the saccade (fERP average). To exclude segments with residual non-ocular artifacts, we  
254 removed all epochs containing peak-to-peak voltage differences  $> 120 \mu\text{V}$  in any channel  
255 (2.3% of ERP and 2.8% of fERP epochs). Epochs were then baseline-corrected by  
256 subtracting the mean channel voltages in the 200 ms interval before stimulus/fixation  
257 onset, respectively.

258

### 259 *Single-subject GLM (first-level analysis)*

260 Stimulus- and fixation-related potentials were analyzed using a massive univariate model  
261 (Smith and Kutas, 2015a) in which a GLM was fitted on each electrode and time point  
262 separately using the *unfold* toolbox (Ehinger and Dimigen, 2018). Analysis of EEG data  
263 with massive univariate models has advantages in terms of higher sensitivity and unbiased  
264 data-driven analysis (Rousselet et al., 2011; Smith and Kutas, 2015a) and allows to  
265 control the effects of continuous covariates on the waveform. For ERPs, the model only  
266 contained the intercept term and one categorical predictor coding whether the preview  
267 stimuli consisted of two scrambled (0) or two intact faces (1). For the fERP analysis, the

268 predictors in the regression model were a three-level categorical predictor coding the type  
269 of preview shown before the saccade (scrambled, incongruent, congruent) as well as two  
270 continuous linear covariates: saccade amplitude and the preview-target luminance  
271 difference. Saccade amplitude (in degrees of visual angle) was added in the model  
272 because the size of the incoming saccade has a well-established and strong influence on  
273 the amplitude of the post-saccadic neural response (e.g. Thickbroom et al., 1991;  
274 Dandekar et al., 2011). Including saccade amplitude as a nuisance variable in the model  
275 therefore controlled for the slight difference in incoming saccade amplitude (about 0.3°,  
276 see *Results*) between the preview conditions. In addition, we also found that the fERP was  
277 modulated by the difference in mean luminance between the stimulus shown as preview  
278 and the post-saccadic target. The mean luminance difference between both stimuli was  
279 therefore also included as a continuous covariate.

280         As a control analysis, we repeated our analysis of the fERP using a GLM-based  
281 linear deconvolution technique (also called continuous-time regression, Dandekar et al.,  
282 2011; Smith and Kutas, 2015b; Ehinger and Dimigen, 2018) that is also implemented in  
283 the *unfold* toolbox. In the current experiment, SRTs were about 30 ms longer for the  
284 scrambled-face preview than for the intact-face preview conditions (see *Results*). This  
285 means that the temporal overlap between the ERP evoked by the onset of the saccade  
286 cue (red/green fixation cross) and the fERP evoked at saccade offset differed  
287 systematically between conditions, potentially biasing the results. GLM-based  
288 deconvolution allows us to control this overlapping activity by modeling the response to  
289 both types of events (cue and fixation onset) in the same statistical model. However, since  
290 the results were virtually identical to those obtained with the simpler univariate model, we  
291 only report the results of the latter here.

292

293 *Group statistics (second-level analysis)*

294 Second-level statistical analyses were performed using the threshold-free cluster  
295 enhancement method (TFCE, Smith and Nichols, 2009; Mensen and Khatami, 2013), a  
296 variant of a cluster-based permutation tests (Maris and Oostenveld, 2007) which controls  
297 for multiple testing across electrodes and time points without the need to define an  
298 arbitrary cluster-forming threshold. Analyses were run using the Matlab implementation of  
299 TFCE ([http://github.com/Mensen/ept\\_TFCE-matlab](http://github.com/Mensen/ept_TFCE-matlab)) based on 2000 random permutations.  
300 For ERPs, we compared the response following an intact-face vs. scrambled-face preview.  
301 For fERPs, we used the ANOVA variant of the TFCE algorithm, followed up by Bonferroni-  
302 corrected pairwise comparisons between the three preview conditions, again using the  
303 TFCE method. For visualization of the TFCE results in Figures 2 and 4,  $p$ -values were  
304 thresholded at  $p < 0.05$ ,  $p < 0.01$ , and  $p < 0.005$ .

305

## 306 **Results**

307 In the following, we first report the neural response evoked by the onset of the preview  
308 stimuli (ERP to intact vs. scrambled faces). This is followed by an analysis of the behavior  
309 and fERP to the post-saccadic face stimulus.

310

### 311 *Preview stimulus onset: evoked response (ERP)*

312 The goal of this analysis was to ensure that our stimuli were effective in eliciting typical  
313 face-related ERP components. Figure 2A shows the scalp-topographic difference maps of  
314 the difference between extrafoveal intact-face previews (i.e. two faces presented bilaterally  
315 at  $\pm 8^\circ$  eccentricity) minus scrambled-face previews (two scrambled faces presented at  $\pm 8^\circ$ ).  
316 Topographies are shown at three latencies after preview stimulus onset, corresponding to  
317 the peaks of the P1 (124 ms), N1 (226 ms) and P3 (350 ms) components. White dots in  
318 the scalp maps indicate electrodes which showed significant differences between intact-  
319 and scrambled- face previews at the given latency (in a pairwise TFCE-based  $t$ -test). The

320 grand-mean waveforms in Figure 2B show the stimulus-ERP elicited by the onset of the  
321 bilateral preview display, averaged across two occipito-temporal electrodes over the left  
322 (PO7) and right hemisphere (PO8).

323 At the earlier latencies, during the P1 component, there was not yet a clear  
324 difference between the ERP responses for the two types of stimuli (intact- vs. scrambled-  
325 faces) beside a small cluster of activation at right frontocentral sites. However, in the  
326 following N1 time window, a strong bilateral negativity emerged at occipital-temporal  
327 electrode sites that was slightly larger over the right hemisphere, as typical for N170 face  
328 effects (Eimer, 2012). Over frontocentral sites, the posterior N170 effect was accompanied  
329 by a corresponding “vertex positive potential” (VPP); a broad positive potential generally  
330 taken to reflect the positive poles of the bilateral dipole pair giving rise to the occipito-  
331 temporal N170 (Eimer, 2012). These results clearly therefore show how the bilateral  
332 presentation of the face preview (dashed green-pink line) led to a markedly different  
333 evoked response than that of the scrambled-face images (blue line) (Fig. 2B); with faces  
334 eliciting a much more pronounced N170 component over occipital-temporal sites (Halgren  
335 et al., 2000; Hoshiyama et al., 2003; Deffke et al., 2007; Gao and Wilson, 2013). In  
336 contrast, only a weaker effect (i.e. smaller frontocentral cluster) of preview type was  
337 observed during the earlier P1 component (Fig. 2A). With a peak at around 226 ms, the  
338 N170 reached its peak about 50 ms later than typically observed (Bentin et al., 1996). A  
339 likely reason for this delayed N170 peak is that the two face stimuli were presented  
340 bilaterally in the extrafoveal visual field, rather than in the fovea. By looking at the full  
341 matrix of TFCE-corrected  $p$ -values depicted in Fig. 2C, it is clear how clusters of significant  
342 activation arose at around 160 ms after stimulus onset, both over antero-frontal areas and  
343 occipito-temporal electrodes. Although the difference between the intact-face and  
344 scrambled-face preview condition reached its maximum after 224 ms, this effect remained

345 topographically stable and statistically significant throughout the entire stimulus-locked  
346 analysis period (i.e. until 600 ms after stimuli onset).

347

#### 348 *Preview effects: behavioral results*

349 Figure 3 summarizes behavioral performance in the task. A first finding is that saccadic  
350 reaction times (SRTs) were affected by the preview condition: SRTs were about 30 ms  
351 faster in trials with an intact compared to a scrambled-face preview (intact vs. scrambled:  
352  $t(14) = -4.673$ ;  $p < 0.0004$ ) (Fig. 3A). The same pattern was also reflected in the saccade  
353 amplitudes, which were slightly larger ( $\sim 0.3^\circ$ ) when the preview was an intact rather than a  
354 scrambled face (Fig. 3B,  $t(14) = 8.259$ ;  $p < 0.000001$ ). This pattern of results indicates that  
355 seeing a possible target stimulus – that is, a face – in the periphery enhanced the  
356 preparation of the oculomotor response toward the target.

357 For the gender discrimination task following the saccade, response accuracy was  
358 generally high (89% correct) and did not differ between preview conditions ( $F(2,26) =$   
359  $0.475$   $p < 0.627$ ). However, like SRTs, manual RTs for the button press depended strongly  
360 on the preview condition (main effect;  $F(2,26) = 8.535$   $p < 0.001$ ) with numerically shorter  
361 RTs observed in the two conditions in which a congruent- or an incongruent face was  
362 shown as a preview compared to the scrambled-face condition (Figure 3, right panel).  
363 Bonferroni-corrected post-hoc tests confirmed that congruent face previews produced  
364 significantly shorter RTs than scrambled previews,  $t(13) = -3.802$ ;  $p < 0.007$ . Importantly,  
365 this effect replicates the classic trans-saccadic preview benefit also observed with other  
366 types of stimuli, in particular words (Rayner, 1975; Dimigen et al., 2012). When the  
367 preview was an incongruent face, there was a only a statistical trend for faster RTs as  
368 compared to the scrambled-preview condition,  $t(13) = -2.546$ ;  $p < 0.07$ . Manual RTs did  
369 not differ significantly between the congruent and incongruent preview condition.

370 Taken together, these results replicate a robust trans-saccadic benefit for  
371 previewed human faces compared to a non-informative scrambled-preview condition. Both  
372 the initial oculomotor response towards the peripheral face as well as the subsequent  
373 foveal processing of the facial features (necessary for the gender discrimination task) were  
374 significantly enhanced if the extrafoveal preview provided before the saccade was also a  
375 human face, supporting the hypothesis of preview facilitation for the processing of face  
376 stimuli.

377

378 *Preview effects: evoked response (fERP)*

379 Main goal of the current study was to compare the fixation-related brain response elicited  
380 by the first direct fixation on the target face as a function of the extrafoveal information  
381 available during the *preceding* fixation: a scrambled face, a different person's face, or the  
382 same face.

383 Figure 4 summarizes the fERP elicited by the first direct fixation on the target face,  
384 that is, after the end of the critical saccade. Top panels (Figure 4A) show the topographic  
385 difference maps for the three contrasts at the peaks of the P1 (106 ms), N1 (180 ms) and  
386 P3 (350 ms) component. The middle panel shows the corresponding fERP waveforms,  
387 averaged again across occipito-temporal electrodes PO7 and PO8. The bottom panel  
388 (Figure 4C) presents the corresponding statistical comparison (TFCE) between the  
389 congruent- and the scrambled-face preview conditions and between the incongruent- and  
390 the scrambled-face preview conditions (Figure 4D).

391 The first interesting observation is that when contrasting the activity following a  
392 congruent- as compared to an incongruent-face preview (Fig. 4A, top row), there was no  
393 sign of a significant difference across the entire scalp for any of the main components. In  
394 the second and third rows of Fig. 4A, we contrasted the activity of the incongruent- or  
395 congruent- face, respectively, against the scrambled-face preview. Differently from the



396 previous comparison, it is now evident that seeing a face rather than a scramble-face  
397 stimulus in the periphery led to a completely different response pattern at the time of the  
398 new fixation, once the target face was foveated. While the fixation-related P1 did not differ  
399 between conditions, the following N1 component was dramatically influenced by the type  
400 of preview visible during the preceding fixation. In particular, we report a strong positivity at  
401 occipito-temporal channels, corresponding to a strong attenuation of the fixation-related  
402 N170 in the conditions in which a congruent or incongruent face was visible before the  
403 saccade. This effect was more pronounced over the right hemisphere, and a  
404 corresponding negative pole over central frontal regions, congruent with the activation  
405 pattern observed for the ERP response time-locked to stimulus onset (see section above).

406 This is especially clear by looking at the three waveforms for the electrodes  
407 PO7/PO8, whereby the incongruent- (green) and congruent- (pink) face preview showed a  
408 strong reduction in the post-saccadic evoked response at the time of the N170, i.e. a  
409 *preview positivity* effect, when compared to the scrambled-face preview (blue) (Figure 4B).  
410 Figure 4C visualizes the complete *p*-values matrix for the contrast between the congruent-  
411 face minus scrambled-face preview condition across the entire epoch. This plot confirms  
412 that the preview positivity began at around 160 ms and persisted up to about 300 ms after  
413 fixation onset. This was then followed by a later and weaker cluster of activation between  
414 around 360 to 420 ms, which shared a similar scalp topography as the initial N170 effect.  
415 For completeness, we also report the *p*-values matrix for the contrast between the  
416 incongruent-face minus scrambled-face preview condition (Figure 4D). The TFCE  
417 statistical matrix highlights how landing on a different face from the one that was available  
418 during the preview led to an almost identical pattern of activation over all the electrodes for  
419 the entire epoch as in the congruent preview condition.

420

## 421 **Discussion**

422 Neural correlates of face and object recognition have traditionally been studied by flashing  
423 stimuli to the central visual field during prolonged visual fixation. In contrast, natural vision  
424 typically affords an extrafoveal preview of soon-to-be fixated items before they are brought  
425 into the fovea with a saccade. Here we show that the extrafoveal preview of a face  
426 stimulus leads to a dramatic reduction in the post-saccadic evoked response to that  
427 stimulus, compared to a control condition in which a meaningful preview was withheld by  
428 scrambling the spectral phase of the preview stimulus. This reduction occurred even  
429 though a face stimulus was always present after the saccade, with only the pre-saccadic  
430 preview differing between the conditions. Interestingly, this preview reduction was similar  
431 for trials in which the exact same face was present across the saccade (congruent-face  
432 condition) and when a different face was present after the saccade (incongruent-face  
433 condition). In particular, the N170 component, which is classically linked to the structural  
434 processing of faces, was substantially reduced in trials with a face preview than those with  
435 a scrambled preview. More generally, the fixation-related evoked response to the post-  
436 saccadic face was strongly attenuated, consistent with a “preview benefit” (i.e. reduction)  
437 in the evoked response as previously observed for visual words (Dimigen et al., 2012).  
438 These findings are consistent with claims that both visual and category-specific information  
439 about the saccadic target can influence post-saccadic processing of that stimulus (for  
440 review, see: Melcher and Colby, 2008; Melcher and Morrone, 2015).

441 A critical issue in the context of preview studies is whether the peripheral preview  
442 influences early or late ERP components (Edwards et al., 2017). Interestingly, in our data,  
443 a significant preview effect arose only after the end of the P1 component, around 160 ms  
444 after fixation onset. Current theories suggest that face processing involves several stages  
445 of neural processing which differ in terms of their feature-selectivity, neural substrate, and  
446 associated ERP components. In particular, the *occipital face area* has been implicated in

447 processing parts of faces, such as eyes or mouth, and suggested to influence the P100  
448 component (Pitcher et al., 2007; Sadeh et al., 2010), while the *fusiform face area* is  
449 associated with processing facial identity and thought to be reflected in N170 activity,  
450 typically associated with “structural encoding” (Halgren et al., 2000; Hoshiyama et al.,  
451 2003; Deffke et al., 2007; Gao and Wilson, 2013). From our results, the peripheral preview  
452 related modulation is therefore more consistent with processing of facial identity and  
453 structural encoding (Sadeh et al., 2010), rather than individual parts. The lack of any  
454 difference between congruent and incongruent previews is also consistent with processing  
455 at the level of the face representation rather than specific local features. This result is  
456 compatible with the task in which the participants were involved, that was a gender  
457 discrimination, suggesting that participants might have focused more on the global  
458 features of the stimuli presented rather than any specific face part. At the same time, the  
459 preview faces in our study were presented in the periphery as part of a bilateral pair of  
460 stimuli, and so future work is needed to investigate whether earlier components might be  
461 influenced when the competition between two stimuli is removed and only one face  
462 stimulus is presented in isolation in the periphery.

463         The morphology of the effects observed here also argues strongly against an  
464 interpretation of preview effects as merely the absence of surprise or a change in context,  
465 since such effects are more typically reflected in the later centroparietal P3 component  
466 (Sutton et al., 1965; Duncan-Johnson and Donchin, 1977; Donchin, 1981). Indeed we  
467 observed a persistence of positivity also in the later part of the fERP (as well as in the ERP  
468 during fixation), that in the context of face stimuli might be associated with processing of  
469 dynamic aspects of the face in the Superior Temporal Sulcus (Itier and Taylor, 2004;  
470 Sadeh et al., 2010; Dalrymple et al., 2011). Also, there was a face stimulus present after  
471 the saccade in every trial, meaning that the face target was not a surprise in the traditional  
472 sense.

473 It is important to note that the overall pattern of results is not consistent with  
474 hypotheses based on a primary role for spatial attention or for priming. Prior to saccade  
475 execution attention is allocated to the saccade target (Hoffman and Subramaniam, 1995;  
476 Deubel and Schneider, 1996; Zhao et al., 2012; Buonocore et al., 2017) and such  
477 allocation might be associated with an enhancement of the P1 and N1 components of the  
478 fixation-related ERP (see also: Eimer, 2000; Mohamed et al., 2009; Sreenivasan et al.,  
479 2009; Churches et al., 2010; Meyberg et al., 2015). Results from a number of paradigms  
480 have in fact shown that stimuli that might be relevant as peripheral previews can lead to an  
481 increased evoked response. For example, repeating a face leads to increased (i.e. more  
482 negative) ERP amplitudes in the time window following the peak of the N170 (N250 early  
483 repetition priming effect; Schweinberger et al., 1995) rather than the decreased amplitude  
484 seen here for trans-saccadic preview. On the other hand, prediction mechanisms would  
485 have led to a reduction in evoked responses. Indeed, our results are consistent with the  
486 prediction hypothesis and the idea that prediction and attention can be dissociated by  
487 looking at the direction of effects, with enhanced evoked activity for attention and  
488 attenuated responses for prediction (Kok et al., 2012; Spaak et al., 2016; de Lange et al.,  
489 2018). Nonetheless, we cannot completely rule out that the relatively stronger response in  
490 the scrambled-face condition might be at least partially modulated by the visual  
491 discrepancy between the foveated face stimulus compared to the scrambled stimulus seen  
492 in the extrafoveal visual field during the preview interval. According to this framework, the  
493 larger N1 for the scrambled-face preview condition would share some features with the  
494 visual mismatch negativity (Stefanics et al., 2014; Kornrumpf et al., 2016). One could then  
495 argue that in the scrambled-face preview condition (i.e. the condition where the prediction  
496 is not matched), the onset of the face stimulus might lead to an enhanced “mismatch”  
497 response compared to conditions where participants were seeing a face before and after  
498 the saccade (i.e. conditions where the prediction is matched). In this regard, the

499 interpretation of the results would be compatible with the idea of an increase in amplitude  
500 for the “unpredicted” condition.

501 It is also important to note that the fixation-related ERPs elicited by faces brought to  
502 the fovea by the saccade showed a generally similar N170 component to that traditionally  
503 observed for a sudden face onsets in the fovea (Soto et al., 2018). Given that face  
504 perception in real life is typically in response to a face brought to the fovea from the  
505 periphery, rather than a face appearing out of nowhere, it was critically important to show  
506 the ecological validity of such category-specific components. In future work, it would be  
507 interesting to see whether the fixation-related N170 behaves in a similar way to the classic  
508 ERP component under various manipulations such as inversion (Bentin et al., 1996).

509 Finally, our results are in line with the pattern of results reported in the decoding  
510 study by Edwards and colleagues (Edwards et al., 2017) but also expand on their work in  
511 several ways. First, we could at least in part address the issue of whether the modulation  
512 of the fERP represents a preview benefit rather than a change-related cost, due to  
513 including a scrambled-face condition that was not part of their design. In their study, there  
514 was only a valid or invalid preview condition. Some reduction in decoding performance  
515 might have resulted, for example, from the added noise in the invalid preview condition  
516 due to a visual mismatch negativity-related signal. Another way in which their results might  
517 reflect an invalid cost (rather than validity benefit) is that the use of a decoding measure  
518 means that information about the invalid preview might still have been available well into  
519 the new fixation, with that information interfering with the decoding of the post-saccadic  
520 stimulus. As described above, there is evidence that visual processing during the first 50-  
521 100 ms of a new fixation is driven at least in part by pre-saccadic information, followed by  
522 a potentially shift to processing the new input at the current foveal position. Future work is  
523 needed to clarify the question of how pre-saccadic object-specific information influences

524 the earliest stages of visual processing and how this might depend on task requirements  
525 (such as the gender task used here).

526 More generally, the current study provides a proof of concept for the usefulness of  
527 the fERP paradigm for studying trans-saccadic integration and visual stability. Follow-up  
528 studies can use this technique to investigate the mechanisms underlying trans-saccadic  
529 perception to distinguish between competing theories of how our impression of the visual  
530 world remains stable despite the retinal image changing so dramatically an average of  
531 three times per second.

## 532 **References**

- 533 Bentin S, Allison T, Puce A, Perez E, McCarthy G (1996) Electrophysiological Studies of  
534 Face Perception in Humans. *Journal of cognitive neuroscience* 8:551-565.
- 535 Brainard DH (1997) The Psychophysics Toolbox. *Spatial Vision* 10:433-436.
- 536 Buonocore A, Fracasso A, Melcher D (2017) Pre-saccadic perception: Separate time  
537 courses for enhancement and spatial pooling at the saccade target. *PLoS ONE*  
538 12:e0178902-0178923.
- 539 Churches O, Wheelwright S, Baron-Cohen S, Ring H (2010) The N170 is not modulated  
540 by attention in autism spectrum conditions. *NeuroReport* 21:399-403.
- 541 Clark A (2013) Whatever next? Predictive brains, situated agents, and the future of  
542 cognitive science. *Behavioral and Brain Sciences* 36:181-204.
- 543 Cornelissen FW, Peters EM, Palmer J (2002) The Eyelink Toolbox: Eye tracking with  
544 MATLAB and the Psychophysics Toolbox. *Behavior research methods, instruments,*  
545 *& computers : a journal of the Psychonomic Society, Inc* 34:613-617.
- 546 Dalrymple KA, Oruç I, Duchaine B, Pancaroglu R, Fox CJ, Iaria G, Handy TC, Barton JJS  
547 (2011) The anatomic basis of the right face-selective N170 IN acquired  
548 prosopagnosia: A combined ERP/fMRI study. *Neuropsychologia* 49:2553-2563.
- 549 Dandekar S, Privitera C, Carney T, Klein SA (2011) Neural saccadic response estimation  
550 during natural viewing. *Journal of Neurophysiology* 107:1776-1790.
- 551 de Lange FP, Heilbron M, Kok P (2018) How Do Expectations Shape Perception? *Trends*  
552 *in Cognitive Sciences* 22:764-779.
- 553 Deffke I, Sander T, Heidenreich J, Sommer W, Curio G, Trahms L, Lueschow A (2007)  
554 MEG/EEG sources of the 170-ms response to faces are co-localized in the fusiform  
555 gyrus. *NeuroImage* 35:1495-1501.

- 556 Delorme A, Makeig S (2004) EEGLAB: an open source toolbox for analysis of single-trial  
557 EEG dynamics including independent component analysis. *Journal of Neuroscience*  
558 *Methods* 134:9-21.
- 559 Deubel H, Schneider WX (1996) Saccade target selection and object recognition:  
560 Evidence for a common attentional mechanism. *Vision Research* 36:1827-1837.
- 561 Dimigen O, Kliegl R, Sommer W (2012) Trans-saccadic parafoveal preview benefits in  
562 fluent reading: A study with fixation-related brain potentials. *NeuroImage* 62:381-  
563 393.
- 564 Dimigen O, Sommer W, Hohlfeld A, Jacobs AM, Kliegl R (2011) Coregistration of eye  
565 movements and EEG in natural reading: analyses and review. *J Exp Psychol Gen*  
566 140:552-572.
- 567 Donchin E (1981) Surprise!... Surprise? *Psychophysiology* 18:493-513.
- 568 Duncan-Johnson CC, Donchin E (1977) On Quantifying Surprise: The Variation of Event-  
569 Related Potentials With Subjective Probability. *Psychophysiology* 14:456-467.
- 570 Dunkley BT, Baltaretu B, Crawford JD (2016) Trans-saccadic interactions in human  
571 parietal and occipital cortex during the retention and comparison of object  
572 orientation. *Cortex* 82:263-276.
- 573 Edwards G, VanRullen R, Cavanagh P (2017) Decoding trans-saccadic memory. *The*  
574 *Journal of Neuroscience*.
- 575 Ehinger BV, Dimigen O (2018) Unfold: An integrated toolbox for overlap correction, non-  
576 linear modeling, and regression-based EEG analysis. *bioRxiv*:360156.
- 577 Eimer M (2000) Attentional modulations of event-related brain potentials sensitive to faces.  
578 *Cognitive Neuropsychology* 17:103-116.
- 579 Eimer M (2012) The Face-Sensitive N170 Component of the Event-Related Brain  
580 Potential.



- 581 Fairhall SL, Schwarzbach J, Lingnau A, Van Koningsbruggen MG, Melcher D (2017)  
582 Spatiotopic updating across saccades revealed by spatially-specific fMRI  
583 adaptation. *NeuroImage* 147:339-345.
- 584 Gao X, Wilson HR (2013) The neural representation of face space dimensions.  
585 *Neuropsychologia* 51:1787-1793.
- 586 Halgren E, Raji T, Marinkovic K, Jousmäki V, Hari R (2000) Cognitive Response Profile of  
587 the Human Fusiform Face Area as Determined by MEG. *Cerebral Cortex* 10:69-81.
- 588 Hoffman JE, Subramaniam B (1995) The role of visual attention in saccadic eye  
589 movements. *Perception & Psychophysics* 57:787-795.
- 590 Hoshiyama M, Kakigi R, Watanabe S, Miki K, Takeshima Y (2003) Brain responses for the  
591 subconscious recognition of faces. *Neuroscience Research* 46:435-442.
- 592 Itier RJ, Taylor MJ (2004) Source analysis of the N170 to faces and objects. *NeuroReport*  
593 15:1261-1265.
- 594 Kok P, Rahnev D, Jehee JFM, Lau HC, de Lange FP (2012) Attention Reverses the Effect  
595 of Prediction in Silencing Sensory Signals. *Cerebral Cortex* 22:2197-2206.
- 596 Kornrumpf B, Niefind F, Sommer W, Dimigen O (2016) Neural Correlates of Word  
597 Recognition: A Systematic Comparison of Natural Reading and Rapid Serial Visual  
598 Presentation. *Journal of Cognitive Neuroscience* 28:1374-1391.
- 599 Maris E, Oostenveld R (2007) Nonparametric statistical testing of EEG- and MEG-data.  
600 *Journal of Neuroscience Methods* 164:177-190.
- 601 Mathôt S, Theeuwes J (2011) Visual attention and stability. *Philosophical Transactions of*  
602 *the Royal Society B: Biological Sciences* 366:516.
- 603 Melcher D (2005) Spatiotopic Transfer of Visual-Form Adaptation across Saccadic Eye  
604 Movements. *Current Biology* 15:1745-1748.
- 605 Melcher D (2011) Visual stability. *Philosophical Transactions of the Royal Society B:*  
606 *Biological Sciences* 366:468-475.

- 607 Melcher D, Colby CL (2008) Trans-saccadic perception. *Trends in Cognitive Sciences*  
608 12:466-473.
- 609 Melcher D, Morrone MC (2015) Nonretinotopic visual processing in the brain. *Visual*  
610 *Neuroscience* 32:E017.
- 611 Mensen A, Khatami R (2013) Advanced EEG analysis using threshold-free cluster-  
612 enhancement and non-parametric statistics. *NeuroImage* 67:111-118.
- 613 Meyberg S, Werkle-Bergner M, Sommer W, Dimigen O (2015) Microsaccade-related brain  
614 potentials signal the focus of visuospatial attention. *NeuroImage* 104:79-88.
- 615 Mohamed TN, Neumann MF, Schweinberger SR (2009) Perceptual load manipulation  
616 reveals sensitivity of the face-selective N170 to attention. *NeuroReport* 20:782-787.
- 617 Pelli DG (1997) The VideoToolbox software for visual psychophysics: transforming  
618 numbers into movies. *Spatial Vision* 10:437-442.
- 619 Pitcher D, Walsh V, Yovel G, Duchaine B (2007) TMS Evidence for the Involvement of the  
620 Right Occipital Face Area in Early Face Processing. *Current Biology* 17:1568-1573.
- 621 Rao RPN, Ballard DH (1999) Predictive coding in the visual cortex: a functional  
622 interpretation of some extra-classical receptive-field effects. *Nature Neuroscience*  
623 2:79.
- 624 Rayner K (1975) The perceptual span and peripheral cues in reading. *Cognitive*  
625 *Psychology* 7:65-81.
- 626 Rousselet GA, Gaspar CM, Wieczorek KP, Pernet CR (2011) Modeling Single-Trial ERP  
627 Reveals Modulation of Bottom-Up Face Visual Processing by Top-Down Task  
628 Constraints (in Some Subjects). *Frontiers in psychology* 2:137-137.
- 629 Sadeh B, Podlipsky I, Zhdanov A, Yovel G (2010) Event-related potential and functional  
630 MRI measures of face-selectivity are highly correlated: A simultaneous ERP-fMRI  
631 investigation. *Human Brain Mapping* 31:1490-1501.

- 632 Schweinberger SR, Pfütze E-M, Sommer W (1995) Repetition priming and associative  
633 priming of face recognition: Evidence from event-related potentials. *Journal of*  
634 *Experimental Psychology: Learning, Memory, and Cognition* 21:722-736.
- 635 Smith NJ, Kutas M (2015a) Regression-based estimation of ERP waveforms: I. The rERP  
636 framework. *Psychophysiology* 52:157-168.
- 637 Smith NJ, Kutas M (2015b) Regression-based estimation of ERP waveforms: II. Nonlinear  
638 effects, overlap correction, and practical considerations. *Psychophysiology* 52:169-  
639 181.
- 640 Smith SM, Nichols TE (2009) Threshold-free cluster enhancement: Addressing problems  
641 of smoothing, threshold dependence and localisation in cluster inference.  
642 *NeuroImage* 44:83-98.
- 643 Soto V, Tyson-Carr J, Kokmotou K, Roberts H, Cook S, Fallon N, Giesbrecht T, Stancak A  
644 (2018) Brain Responses to Emotional Faces in Natural Settings: A Wireless Mobile  
645 EEG Recording Study. *Frontiers in Psychology* 9.
- 646 Spaak E, Fonken Y, Jensen O, de Lange FP (2016) The Neural Mechanisms of Prediction  
647 in Visual Search. *Cerebral Cortex* 26:4327-4336.
- 648 Sreenivasan KK, Goldstein JM, Lustig AG, Rivas LR, Jha AP (2009) Attention to faces  
649 modulates early face processing during low but not high face discriminability.  
650 *Attention, Perception, & Psychophysics* 71:837-846.
- 651 Srinivasan MV, Laughlin SB, Dubs A (1982) Predictive coding: a fresh view of inhibition in  
652 the retina. *Proceedings of the Royal Society of London Series B, Biological*  
653 *sciences* 216:427-459.
- 654 Stefanics G, Kremláček J, Czigler I (2014) Visual mismatch negativity: a predictive coding  
655 view. *Frontiers in Human Neuroscience* 8.
- 656 Sutton S, Braren M, Zubin J, John ER (1965) Evoked-Potential Correlates of Stimulus  
657 Uncertainty. *Science* 150:1187.

- 658 Thickbroom GW, Knezevic W, Carroll WM, Mastaglia FL (1991) Saccade onset and offset  
659 lambda waves: relation to pattern movement visually evoked potentials. *Brain*  
660 *Research* 551:150-156.
- 661 Thiele A, Bellgrove MA (2018) Neuromodulation of Attention. *Neuron* 97:769-785.
- 662 Wolfe BA, Whitney D (2014) Facilitating recognition of crowded faces with presaccadic  
663 attention. *Frontiers in Human Neuroscience* 8.
- 664 Zhao M, Gersch TM, Schnitzer BS, Doshier BA, Kowler E (2012) Eye movements and  
665 attention: The role of pre-saccadic shifts of attention in perception, memory and the  
666 control of saccades. *Vision Research* 74:40-60.
- 667 Zimmermann E, Weidner R, Abdollahi RO, Fink GR (2016) Spatiotopic Adaptation in  
668 Visual Areas. *Journal of Neuroscience* 36:9526-9534.
- 669
- 670

671 **Figure captions**

672

673 **Figure 1.** Trial scheme. At the beginning of each trial, participants fixated a central fixation  
674 cross 1000 ms. Afterwards, two placeholders appeared in the periphery at  $\pm 8$  degree to  
675 the left and right of fixation (Placeholders panel). After 1000 ms, two preview stimuli  
676 appeared at the position of the placeholders for 500 ms (Preview panel). These stimuli  
677 could be either scrambled-faces (blue outline) or intact-faces or (dashed green-pink  
678 outline). After the preview interval, the central cross turned either green (left) or red (right),  
679 thereby cueing the participant to execute a saccade towards the left or right placeholder,  
680 respectively (Saccade cue panel). During the saccade, the preview was first changed into  
681 a scrambled image patch for one display cycle (8.3 ms) in order to introduce a peri-  
682 saccadic transient in all three conditions (Transient panel). Afterwards, the stimulus  
683 changed to the target face in all conditions (Target panel). The relationship between the  
684 preview stimulus and the target face yielded three conditions for the behavioral and  
685 fixation-related EEG analysis: a scrambled preview condition (blue outline), an incongruent  
686 preview condition (green outline; different face seen before and after saccade), and a  
687 congruent preview condition (pink outline; same face seen before and after saccade).  
688 Participants were asked to discriminate the gender (male/female) of the face visible after  
689 the saccade with a button press. Note that stimuli are not drawn to scale.

690

691 **Figure 2.** Event-related potentials aligned to the onset of the preview display. (A)  
692 Topographic difference maps between intact-face previews minus scrambled-face  
693 previews for three latencies after stimulus onset that represent the peak latencies of the  
694 P1, N1, and P300, respectively. White dots represent electrodes that show significant  
695 differences between the two preview conditions in the TFCE statistic at this latency. (B)  
696 Grand-mean stimulus-locked ERP, averaged over occipito-temporal electrodes PO7 and

697 PO8 for intact-face previews (green-pink) and scrambled-face previews (blue). (C) Results  
698 of the TFCE statistic comparing face- and scrambled-face previews at all time points and  
699 channels. For visualization,  $p$ -values are thresholded at 0.05, 0.01, and 0.005 with  
700 different shades of blue.

701

702 **Figure 3.** Behavioral results. Panels show the average (A) saccadic reaction time, (B)  
703 saccadic amplitude, and (C) manual RT for the scrambled-, incongruent-, and congruent-  
704 face preview condition, respectively. Asterisks denote  $p < 0.05$ . Error bars denote  $\pm 1$  SEM.

705

706 **Figure 4.** Fixation-related potentials (fERP). (A) Topographic difference maps for the  
707 difference between the congruent vs. incongruent (top row), incongruent vs. scrambled  
708 (middle row) and congruent vs. scrambled preview condition (bottom row) at three  
709 latencies after fixation onset on the target face. The latencies correspond to the P1, N1,  
710 and P300, respectively. (B) Grand-mean fERP averaged across occipito-temporal  
711 electrodes PO7 and PO8 for the scrambled (blue), incongruent (green) and congruent face  
712 preview condition (blue). Note that the three conditions only differ in terms of the stimulus  
713 seen before the saccade, the target face fixated at time zero of this plot was the same in  
714 all three conditions. (C-D) TFCE results for the pairwise comparison between the  
715 congruent- and scrambled-face preview condition and the incongruent- and scrambled-  
716 face preview condition respectively.

717

718 **Figure 1.**

719

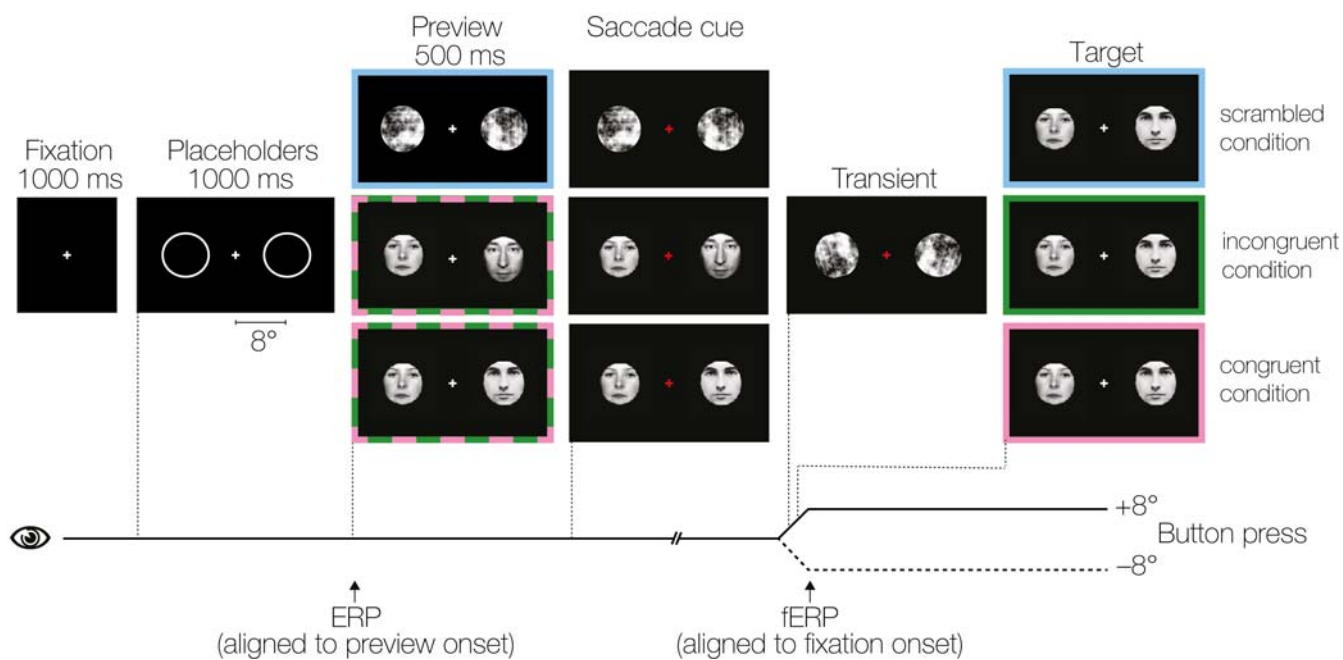

720

721

722 **Figure 2.**

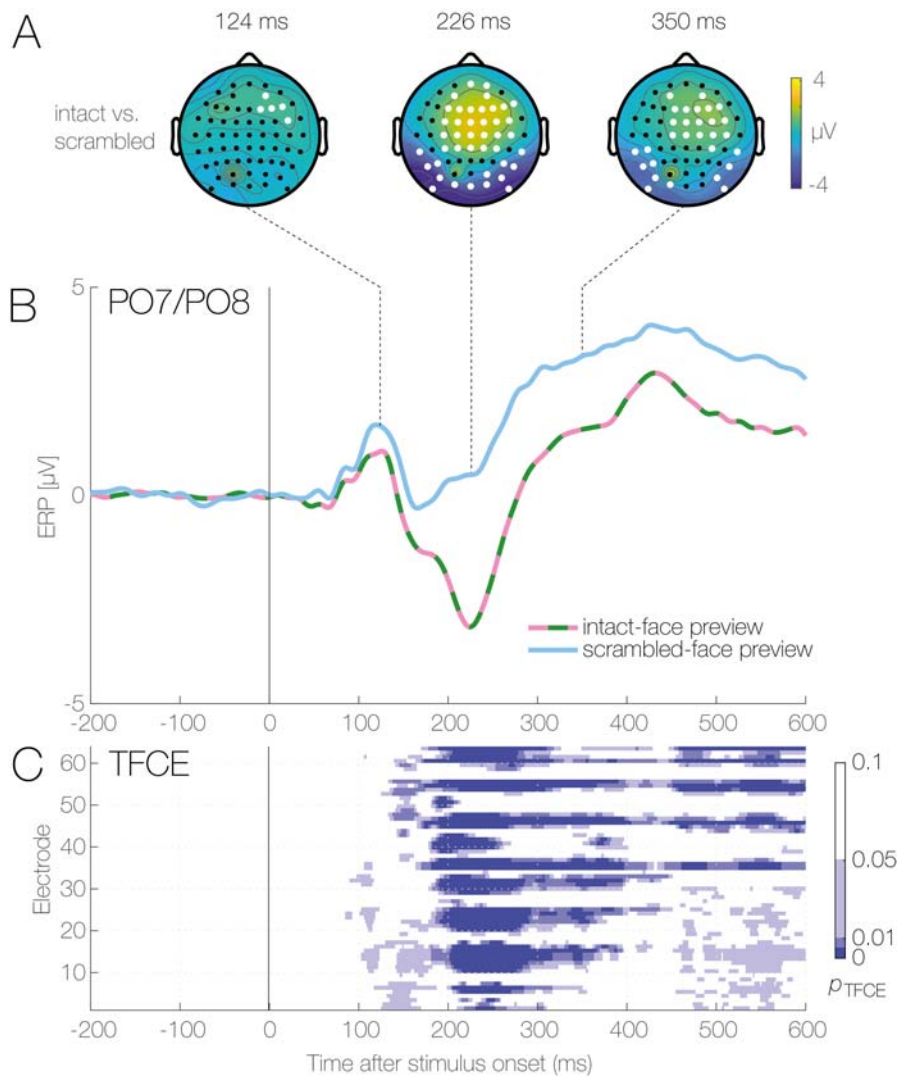

723



724 **Figure 3.**

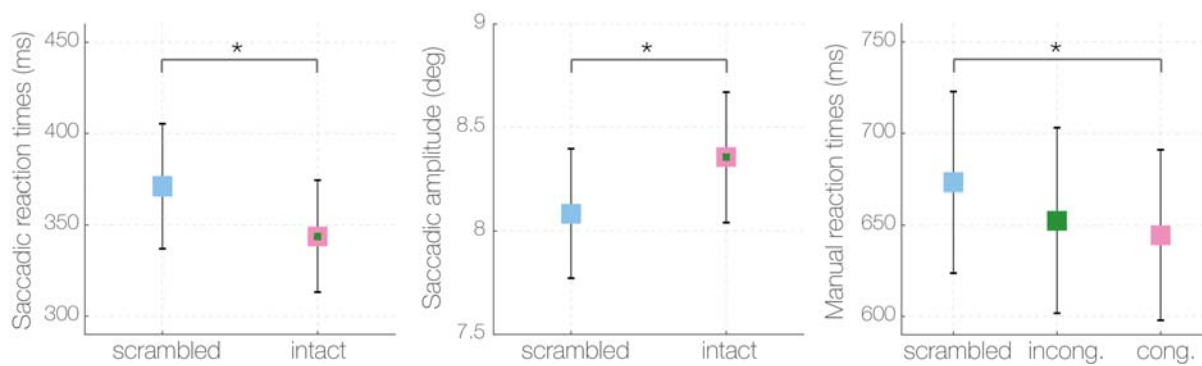

726 **Figure 4.**

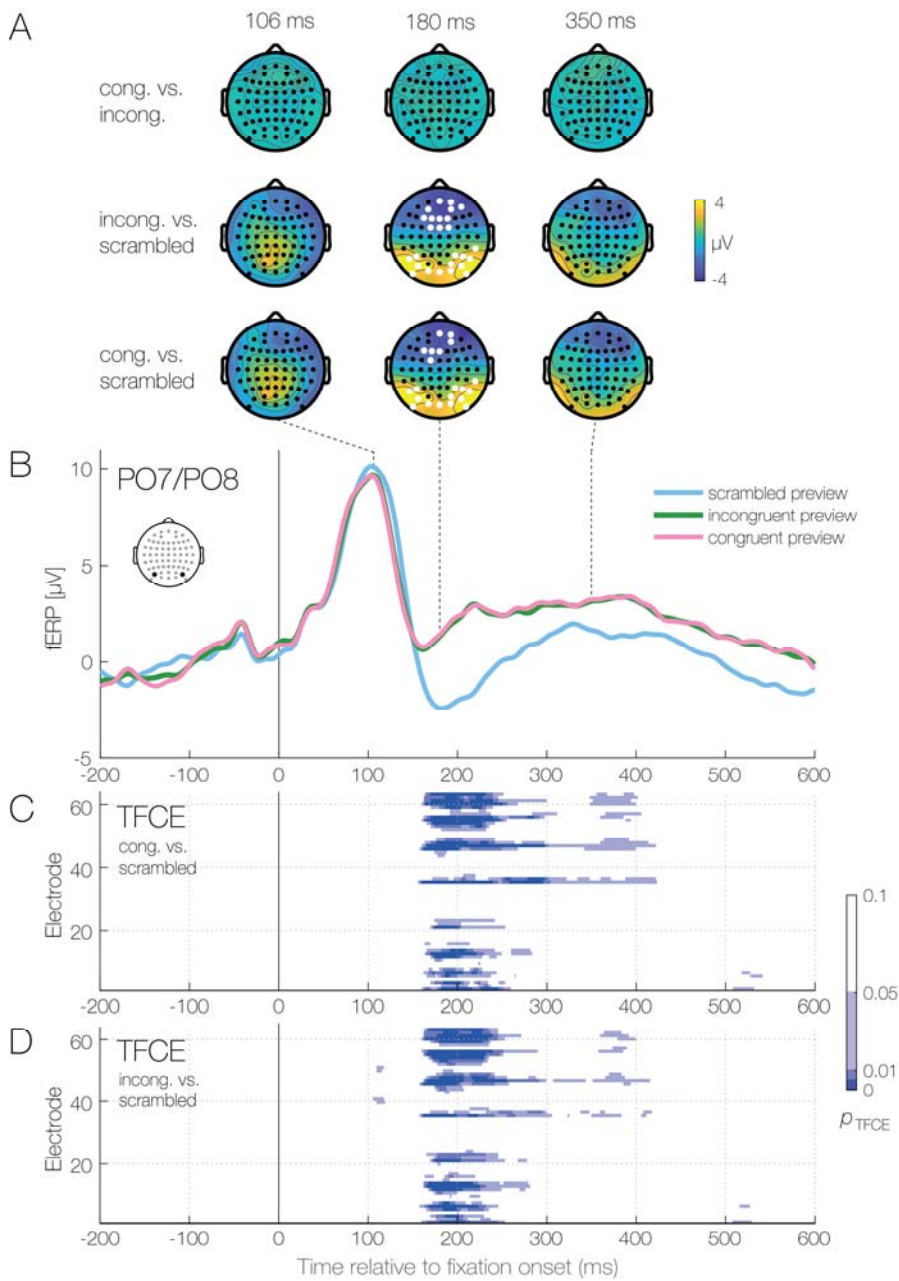

727
